# Supplementary material for: Placebo Response and Media Attention in Randomized Clinical Trials Assessing Cannabis-Based Therapies for Pain: A Systematic Review and Meta-analysis
Source: PubMed Central journal article supplement (PMC9706362; doi:10.1001/jamanetworkopen.2022.43848), 2022-11-28

## Supplementary Online Content

Gedin F, Blomé S, Pontén M, et al. Placebo response and media attention in randomized clinical trials assessing cannabis-based therapies for pain: a systematic review and meta-analysis. *JAMA Netw Open*. 2022;5(11):e2243848.  
doi:10.1001/jamanetworkopen.2022.43848

**eTable 1.** Search Strategies

**eTable 2.** Excluded Articles and Reason for Exclusion

**eTable 3.** Risk of Bias Assessments

**eTable 4.** Each Trial's Scientific Citations, Journal Impact Factor, and Altmetric Scores

**eFigure.** Funnel Plot for the Risk of Publication Bias

This supplementary material has been provided by the authors to give readers additional information about their work.

**eTable 1.** Search Strategies**Medline (Ovid)**

|    |                                                                                                     |            |
|----|-----------------------------------------------------------------------------------------------------|------------|
| 1  | Cannabis/                                                                                           | 8926       |
| 2  | exp "Marijuana Use"/                                                                                | 5301       |
| 3  | Medical Marijuana/                                                                                  | 1116       |
| 4  | exp Cannabinoids/                                                                                   | 13758      |
| 5  | (bhang* or cannabi* or ganja* or hash* or hemp* or marijuana* or marihuana* or marijuana).ti,ab,kf. | 55503      |
| 6  | or/1-5                                                                                              | 60051      |
| 7  | exp Pain/                                                                                           | 389370     |
| 8  | (pain* or neuralgia*).ti,ab,kf.                                                                     | 687785     |
| 9  | or/7-8                                                                                              | 831552     |
| 10 | Randomized Controlled <a href="#">Trial.pt.</a>                                                     | 501769     |
| 11 | Controlled Clinical <a href="#">Trial.pt.</a>                                                       | 93575      |
| 12 | randomized.ab.                                                                                      | 472899     |
| 13 | placebo.ab.                                                                                         | 205951     |
| 14 | Clinical Trials as Topic.sh.                                                                        | 190378     |
| 15 | randomly.ab.                                                                                        | 329139     |
| 16 | trial.ti.                                                                                           | 214952     |
| 17 | or/10-16                                                                                            | 1275136    |
| 18 | exp Animals/ not Humans.sh.                                                                         | 4678248    |
| 19 | 17 not 18                                                                                           | 1173020    |
| 20 | 6 and 9 and 19                                                                                      | <b>424</b> |

**Embase ([embase.com](https://embase.com))**

('cannabis'/de OR 'cannabis use'/exp OR 'medical cannabis'/de OR 'cannabinoid'/exp OR  
bhang\*:ti,ab,kw OR cannabi\*:ti,ab,kw OR ganja\*:ti,ab,kw OR hash\*:ti,ab,kw OR hemp\*:ti,ab,kw OR  
marijuana\*:ti,ab,kw OR marihuana\*:ti,ab,kw OR marijuana:ti,ab,kw)

AND

('pain'/exp OR pain\*:ti,ab,kw OR neuralgia\*:ti,ab,kw)

AND

('controlled clinical trial'/exp OR random\*:ab OR placebo:ab OR 'clinical trial (topic)'/exp OR trial:ti)  
NOT ([animals]/lim NOT [humans]/lim)

NOT [medline]/lim = **487**

**Updated literature search**

The updated literature search was performed in September of 2021. There were no modifications made to the literature search strategy and the purpose of the updated search was only to include newly published articles.

**Embase ([embase.com](https://embase.com))**

('cannabis'/de OR 'cannabis use'/exp OR 'medical cannabis'/de OR 'cannabinoid'/exp  
OR bhang\*:ti,ab,kw OR cannabi\*:ti,ab,kw OR ganja\*:ti,ab,kw OR hash\*:ti,ab,kw OR hemp\*:ti,ab,kw  
OR marijuana\*:ti,ab,kw OR marihuana\*:ti,ab,kw OR marijuana:ti,ab,kw)

AND

('pain'/exp OR pain\*:ti,ab,kw OR neuralgia\*:ti,ab,kw)

AND

('controlled clinical trial'/exp OR random\*:ab OR placebo:ab OR 'clinical trial (topic)'/exp OR trial:ti)  
NOT ([animals]/lim NOT [humans]/lim)

NOT [medline]/lim

AND [randomized controlled trial]/lim AND [2020-2021]/py

= **42**

**Medline ovid**

|    |                                                                                                     |           |
|----|-----------------------------------------------------------------------------------------------------|-----------|
| 1  | Cannabis/                                                                                           | 7822      |
| 2  | exp "Marijuana Use"/                                                                                | 6458      |
| 3  | Medical Marijuana/                                                                                  | 1449      |
| 4  | exp Cannabinoids/                                                                                   | 15548     |
| 5  | (bhang* or cannabi* or ganja* or hash* or hemp* or marijuana* or marihuana* or marijuana).ti,ab,kf. | 63608     |
| 6  | or/1-5                                                                                              | 67143     |
| 7  | exp Pain/                                                                                           | 418520    |
| 8  | (pain* or neuralgia*).ti,ab,kf.                                                                     | 764157    |
| 9  | or/7-8                                                                                              | 913068    |
| 10 | Randomized Controlled <a href="#">Trial.pt.</a>                                                     | 542796    |
| 11 | Controlled Clinical <a href="#">Trial.pt.</a>                                                       | 94373     |
| 12 | randomized.ab.                                                                                      | 532993    |
| 13 | placebo.ab.                                                                                         | 221223    |
| 14 | Clinical Trials as Topic.sh.                                                                        | 197233    |
| 15 | randomly.ab.                                                                                        | 365375    |
| 16 | trial.ti.                                                                                           | 247058    |
| 17 | or/10-16                                                                                            | 1392241   |
| 18 | 6 and 9 and 17                                                                                      | 538       |
| 21 | limit 18 to (humans and yr="2020 - 2021")                                                           | <b>56</b> |

**eTable 2.** Excluded Articles and Reason for Exclusion

| Publication Year | Author       | Reason for exclusion |              |         |                      |                |
|------------------|--------------|----------------------|--------------|---------|----------------------|----------------|
|                  |              | Population           | Intervention | Control | Outcome              | Other          |
| 2007             | Abrams       | HIV                  |              |         |                      |                |
| 2019             | Almog        |                      |              |         |                      | Abstract       |
| 2009             | Ambler       |                      |              |         |                      | Abstract       |
| 2018             | Amerongen    | Healthy              |              |         |                      |                |
| 1974             | Angelico     |                      |              |         |                      | Letter         |
| 2019             | Babalonis    | Healthy              |              |         |                      |                |
| 2017             | Babalonis    | Healthy              |              |         |                      |                |
| 2014             | Barbara      |                      |              |         |                      | Abstract       |
| 2009             | Chung        |                      |              |         |                      | Abstract       |
| 2012             | Cooper       |                      |              |         |                      | Abstract       |
| 2017             | Cooper       |                      |              |         |                      | Abstract       |
| 2013             | Cooper       | Healthy              |              |         |                      |                |
| 2018             | Cooper       | Healthy              |              |         |                      |                |
| 2009             | Ellis        | HIV                  |              |         |                      |                |
| 2007             | Esfandyari   | Healthy              |              |         |                      |                |
| 2016             | Fionda       |                      |              |         |                      | Abstract       |
| 1977             | Gottschalk   |                      |              |         | Did not measure pain |                |
| 2004             | Grotenhermen |                      |              |         |                      | Commentary     |
| 2018             | Hunter       |                      |              |         |                      | Abstract       |
| 2012             | Kalliomaki   | Healthy              |              |         |                      |                |
| 2013             | Kalliomaki   | Healthy              |              |         |                      |                |
| 2013             | Kalliomaki   | Healthy              |              |         |                      |                |
| 1975             | Karnol       |                      |              |         | Did not measure pain |                |
| 2011             | Klooker      |                      |              |         | Discomfort, not pain |                |
| 2008             | Kraft        | Healthy              |              |         |                      |                |
| 2014             | Leocani      |                      |              |         |                      | Abstract       |
| 2017             | Levin        | Not pain             |              |         |                      |                |
| 2013             | Lötsch       |                      |              |         |                      | Abstract       |
| 2017             | Marinelli    |                      |              |         |                      | Protocol paper |
| 1975             | Milstein     | Healthy              |              |         |                      |                |
| 2003             | Naef         | Healthy              |              |         |                      |                |
| 2004             | Naef         | Healthy              |              |         |                      |                |
| 2009             | Notcutt      |                      |              |         |                      | Abstract       |

|                                               |            |                     |  |                        |                              |                                                |
|-----------------------------------------------|------------|---------------------|--|------------------------|------------------------------|------------------------------------------------|
| 2011                                          | Ostenfeld, | Dentist patients    |  |                        |                              |                                                |
| 2012                                          | Pinsger    |                     |  |                        |                              | Abstract                                       |
| 2009/2010                                     | Pittler    |                     |  |                        |                              | Commentary                                     |
| 2008                                          | Redmond    | Healthy             |  |                        |                              |                                                |
| 2006                                          | Roberts    | Healthy             |  |                        |                              |                                                |
| 2007                                          | Rog        |                     |  | Uncontrolled follow-up |                              |                                                |
| 2005                                          | Salim      |                     |  |                        |                              | Secondary analysis of another article in study |
| 2019                                          | Schindler, |                     |  |                        |                              | Abstract                                       |
| 2013                                          | Sewell     |                     |  |                        |                              | Conference abstract                            |
| 2009                                          | Turcotte   |                     |  |                        |                              | Poster abstract                                |
| 2011                                          | Turcotte   |                     |  |                        | Poster abstract              |                                                |
| 2017                                          | Turner     |                     |  |                        |                              | Conference abstract                            |
| 2006                                          | Wade       |                     |  |                        |                              | Follow-up study of Wade et al. (2004)          |
| 2013                                          | Wallace    |                     |  |                        |                              | Abstract                                       |
| 2017                                          | Wallace    |                     |  |                        |                              | Conference abstract                            |
| 2019                                          | Walter     |                     |  |                        | Discrimination not intensity |                                                |
| 2010B                                         | Ware       |                     |  | Active control         |                              |                                                |
| 2009                                          | Wasan      |                     |  |                        |                              | Conference abstract                            |
| 2018                                          | Werth      |                     |  |                        |                              | Conference abstract                            |
| 2019                                          | Werth      |                     |  |                        |                              | Conference abstract                            |
| 2016                                          | Wilsey     |                     |  |                        |                              | Same participants as Wilsey et al. (2016)      |
| 2009                                          | Zajick     |                     |  |                        |                              | Abstract                                       |
| 2015                                          | Zalai      |                     |  |                        |                              | Abstract                                       |
| 2020                                          | Covelli    | No pain at baseline |  |                        |                              |                                                |
| Articles that did not provide sufficient data |            |                     |  |                        |                              |                                                |
| Year                                          | Author     |                     |  |                        |                              |                                                |
| 2020                                          | Abrams     |                     |  |                        |                              |                                                |
| 2020                                          | Almog      |                     |  |                        |                              |                                                |
| 2017                                          | Amerongen  |                     |  |                        |                              |                                                |
| 2006                                          | Beaulieu   |                     |  |                        |                              |                                                |
| 2021                                          | Beebe      |                     |  |                        |                              |                                                |
| 2006                                          | Blake      |                     |  |                        |                              |                                                |
| 2008                                          | Conte      |                     |  |                        |                              |                                                |
| 2016                                          | Cote       |                     |  |                        |                              |                                                |

|      |                 |
|------|-----------------|
| 2007 | Hagenbach       |
| 1973 | Hill            |
| 1978 | Jochimsen       |
| 2010 | Johnson         |
| 2003 | Karst           |
| 2018 | Lichtman        |
| 2014 | Lynch           |
| 2020 | Meuth           |
| 2008 | Narang          |
| 1975 | Noyes           |
| 2012 | Portenoy        |
| 1977 | Raft            |
| 2010 | Selvarajah      |
| 2014 | Serpell         |
| 1978 | Staquet         |
| 2004 | svendsen        |
| 2015 | Turcott         |
| 2019 | van de Donk     |
| 2004 | Wade            |
| 2008 | Wilsey          |
| 2013 | Wilsey          |
| 2016 | Wilsey,         |
| 2006 | Wissel          |
| 2003 | Zajicek         |
| 2008 | Nietecka-Buchta |

**eTable 3. Risk of Bias Assessments**

The Risk-of-bias tool 2 (ROB 2) criteria were used with the addition of a sixth category for blinding.

| Source                                 | 1. Bias arising from the randomization process | 2. Bias due to deviations from intended interventions | 3. Bias due to missing outcome data | 4. Bias in measurement of the outcome | 5. Bias in selection of the reported result | Bias due to blinding | Overall risk of bias |
|----------------------------------------|------------------------------------------------|-------------------------------------------------------|-------------------------------------|---------------------------------------|---------------------------------------------|----------------------|----------------------|
| <i>Berman, 2004</i> <sup>12</sup>      | Low                                            | Low                                                   | Low                                 | Low                                   | High                                        | Low                  | Moderate             |
| <i>Buggy, 2003</i> <sup>13</sup>       | Low                                            | Low                                                   | Low                                 | Low                                   | High                                        | Low                  | Moderate             |
| <i>Chaves, 2020</i> <sup>14</sup>      | Low                                            | Low                                                   | Low                                 | Low                                   | Low                                         | Low                  | Low                  |
| <i>Corey-Bloom, 2012</i> <sup>15</sup> | Low                                            | Low                                                   | Moderate                            | Low                                   | Low                                         | Low                  | Moderate             |
| <i>De Vries, 2017</i> <sup>16</sup>    | Low                                            | Low                                                   | Moderate                            | Low                                   | Moderate                                    | Low                  | Moderate             |
| <i>Issa, 2014</i> <sup>17</sup>        | Low                                            | Low                                                   | Low                                 | Low                                   | High                                        | Low                  | Moderate             |
| <i>Langford, 2013</i> <sup>23</sup>    | Low                                            | Low                                                   | Low                                 | Low                                   | Low                                         | Low                  | Low                  |
| <i>Malik, 2017</i> <sup>24</sup>       | Low                                            | Low                                                   | Moderate                            | Low                                   | Moderate                                    | Low                  | Moderate             |
| <i>Nurmikko, 2007</i> <sup>25</sup>    | Low                                            | Low                                                   | Low                                 | Low                                   | Moderate                                    | Low                  | Moderate             |
| <i>Rog, 2015</i> <sup>22</sup>         | Low                                            | Low                                                   | Low                                 | Low                                   | Moderate                                    | Moderate             | Moderate             |
| <i>Schimrigk, 2017</i> <sup>18</sup>   | Low                                            | Low                                                   | Low                                 | Low                                   | Moderate                                    | Moderate             | Moderate             |
| <i>Skrabek, 2008</i> <sup>19</sup>     | Moderate                                       | Moderate                                              | Moderate                            | Moderate                              | High                                        | Moderate             | High                 |
| <i>Toth 2012</i> <sup>20</sup>         | Moderate                                       | Moderate                                              | Low                                 | Low                                   | High                                        | Moderate             | High                 |
| <i>Turcott 2018</i> <sup>21</sup>      | Moderate                                       | High                                                  | High                                | Moderate                              | Moderate                                    | High                 | High                 |
| <i>Wade 2003</i> <sup>27</sup>         | Moderate                                       | Moderate                                              | Low                                 | Moderate                              | High                                        | Moderate             | High                 |
| <i>Wallace, 2015</i> <sup>26</sup>     | Low                                            | Low                                                   | Low                                 | Low                                   | Low                                         | Moderate             | Moderate             |
| <i>Ware, 2010</i> <sup>28</sup>        | Low                                            | Low                                                   | Low                                 | Low                                   | Low                                         | Moderate             | Moderate             |
| <i>Weizman, 2018</i> <sup>29</sup>     | Low                                            | Moderate                                              | Low                                 | Low                                   | Moderate                                    | Moderate             | Moderate             |
| <i>Zadikoff, 2011</i> <sup>30</sup>    | Low                                            | Moderate                                              | Low                                 | Low                                   | Low                                         | Moderate             | Moderate             |
| <i>Zajicek, 2012</i> <sup>31</sup>     | Low                                            | Low                                                   | Low                                 | Low                                   | Moderate                                    | Moderate             | Moderate             |



**eTable 4.** Each Trial's Scientific Citations, Journal Impact Factor, and Altmetric Scores

| Source                                 | Crossref Academic citations | Journal Impact Factor | Altmetric score Non-academic citations | Altmetric Age adjusted percentile |
|----------------------------------------|-----------------------------|-----------------------|----------------------------------------|-----------------------------------|
| <i>Berman, 2004</i> <sup>12</sup>      | 219                         | 6                     | 20                                     | 91                                |
| <i>Buggy, 2003</i> <sup>13</sup>       | 120                         | 6                     | 4                                      | 65                                |
| <i>Chaves, 2020</i> <sup>14</sup>      | 5                           | 3                     | 169                                    | 99                                |
| <i>Corey-Bloom, 2012</i> <sup>15</sup> | 107                         | 7                     | 329                                    | 99                                |
| <i>De Vries, 2017</i> <sup>16</sup>    | 37                          | 5                     | 26                                     | 91                                |
| <i>Issa, 2014</i> <sup>17</sup>        | 22                          | 3                     | 5                                      | 76                                |
| <i>Langford, 2013</i> <sup>23</sup>    | 129                         | 5                     | 33                                     | 96                                |
| <i>Malik, 2017</i> <sup>24</sup>       | 23                          | 3                     | 3                                      | 61                                |
| <i>Nurmikko, 2007</i> <sup>25</sup>    | 234                         | 7                     | 24                                     | 94                                |
| <i>Rog, 2005</i> <sup>22</sup>         | 458                         | 10                    | 93                                     | 99                                |
| <i>Schimrigk, 2017</i> <sup>18</sup>   | 41                          | 6                     | 15                                     | 87                                |
| <i>Skrabek, 2008</i> <sup>19</sup>     | 208                         | 6                     | 42                                     | 97                                |
| <i>Toth 2012</i> <sup>20</sup>         | 96                          | 6                     | 15                                     | 92                                |
| <i>Turcott 2018</i> <sup>21</sup>      | 35                          | 3                     | 6                                      | 72                                |
| <i>Wade 2003</i> <sup>27</sup>         | 263                         | 3                     | 59                                     | 97                                |
| <i>Wallace, 2015</i> <sup>26</sup>     | 98                          | 5                     | 285                                    | 99                                |
| <i>Ware, 2010</i> <sup>28</sup>        | 232                         | 7                     | 378                                    | 99                                |
| <i>Weizman, 2018</i> <sup>29</sup>     | 25                          | 8                     | 212                                    | 98                                |
| <i>Zadikoff, 2011</i> <sup>30</sup>    | 23                          | 1                     | 3                                      | 58                                |
| <i>Zajicek, 2012</i> <sup>31</sup>     | 123                         | 8                     | 154                                    | 99                                |
| Mean (SD)                              | 125 (112)                   | 5 (2)                 | 89 (115)                               | 88 (14)                           |

**eFigure 1.** Funnel Plot for the Risk of Publication Bias

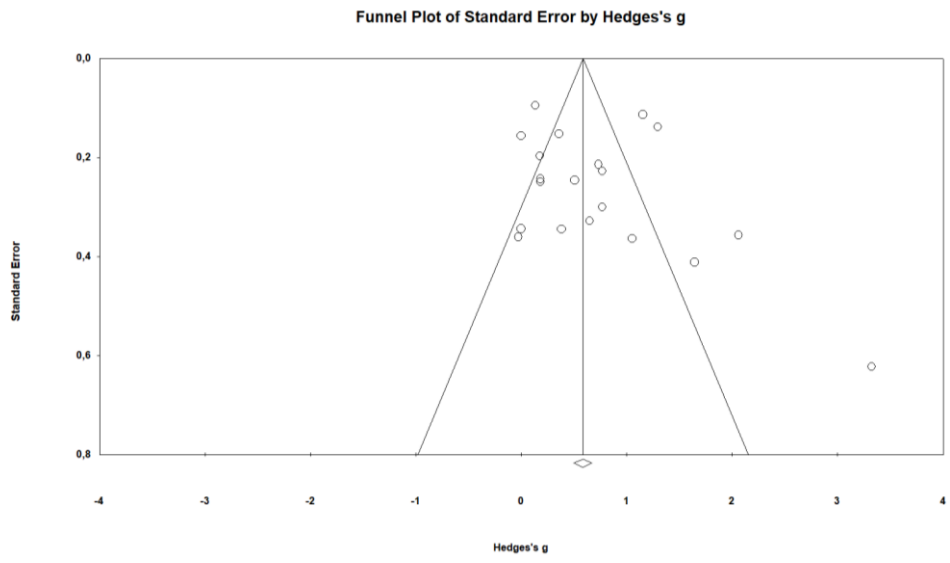

Supplement: jamanetwopen-e2243848-s001.pdf [file jamanetwopen-e2243848-s001.pdf]
