# Supplementary material for: Placebo Response and Media Attention in Randomized Clinical Trials Assessing Cannabis-Based Therapies for Pain: A Systematic Review and Meta-analysis
Source: PubMed Central journal article supplement (PMC9706362; doi:10.1001/jamanetworkopen.2022.43848), 2022-11-28
Supplement: jamanetwopen-e2243848-s002.pdf [file jamanetwopen-e2243848-s002.pdf]

## Data Sharing Statement

Gedin. Placebo Response and Media Attention in Randomized Clinical Trials Assessing Cannabis-Based Therapies for Pain. *JAMA Netw Open*. Published November 28, 2022. doi:10.1001/jamanetworkopen.2022.43848

### Data

**Data available:** No
